Table S1. Association between tamoxifen treatment status and either ER or HER2 status for all tumour explant preparations used

| ID | Tam | HER2 | ER | SA       | IMC      | ITC      | V     | Grade | A | M | N | Node |
|----|-----|------|----|----------|----------|----------|-------|-------|---|---|---|------|
| 1  | N   | -    | -  | 3.71805  | -112.521 | 1331.94  | 0.014 | 3     | 2 | 3 | 3 | -    |
| 2  | N   | -    | -  | 2.15997  | -109.619 | 6096.12  | 0.01  | 3     | 2 | 3 | 3 | -    |
| 3  | N   | -    | -  | 0.814787 | -53.9158 | 149.87   | 0.003 | 3     | 3 | 2 | 3 | +    |
| 4  | N   | -    | -  | 1.50304  | -55.3955 | 1129.3   | 0.006 | 3     | 3 | 2 | 3 | +    |
| 5  | N   | -    | -  | 2.61339  | -157.79  | 15070.9  | 0.014 | 3     | 3 | 3 | 3 | -    |
| 6  | N   | -    | -  | 1.75235  | -114.633 | 9526.25  | 0.008 | 3     | 3 | 3 | 3 | -    |
| 7  | N   | -    | +  | 0.969115 | -81.0478 | 11214.4  | 0.005 | 1     | 3 | 2 | 3 | +    |
| 8  | N   | -    | +  | 3.74823  | -167.097 | 5102.44  | 0.014 | 1     | 3 | 2 | 3 | -    |
| 9  | N   | -    | +  | 4.08243  | -142.723 | 324.015  | 0.017 | 3     | 3 | 2 | 3 | -    |
| 10 | N   | -    | +  | 2.75507  | -79.0427 | 626.393  | 0.013 | 3     | 1 | 1 | 2 | -    |
| 11 | N   | -    | +  | 2.49337  | -79.2312 | -2267.05 | 0.012 | 3     | 1 | 1 | 2 | -    |
| 12 | N   | -    | +  | 2.78076  | -87.8393 | -184.171 | 0.009 | 3     | 3 | 2 | 3 | +    |
| 13 | N   | -    | +  | 3.00992  | -111.694 | 1629.05  | 0.011 | 1     | 3 | 2 | 3 | +    |
| 14 | N   | -    | +  | 0.997003 | -55.0545 | 2619.56  | 0.004 | 3     | 1 | 1 | 2 | -    |
| 15 | N   | +    | -  | 1.31535  | -76.5772 | 2160.98  | 0.005 | 3     | 3 | 2 | 3 | +    |
| 16 | N   | +    | +  | 3.74723  | -141.538 | -2855.45 | 0.016 | 2     | 3 | 1 | 2 | -    |
| 17 | N   | +    | +  | 0.441179 | -35.582  | 3248.06  | 0.002 | 2     | 2 | 3 | 3 | -    |
| 18 | N   | +    | +  | 3.56894  | -143.673 | 2295.02  | 0.017 | 3     | 3 | 1 | 2 | -    |
| 19 | Y   | -    | -  | 2.5846   | -75.4911 | 2863.36  | 0.014 | 3     | 2 | 3 | 3 | -    |
| 20 | Y   | -    | -  | 1.96822  | -68.5846 | 1363.61  | 0.009 | 3     | 2 | 3 | 3 | -    |
| 21 | Y   | -    | -  | 1.60913  | -62.6364 | 4382.64  | 0.009 | 3     | 3 | 3 | 3 | -    |
| 22 | Y   | -    | -  | 1.97023  | -102.94  | 3107.17  | 0.011 | 3     | 3 | 3 | 3 | -    |
| 23 | Y   | -    | +  | 1.67211  | -77.8919 | 4412.2   | 0.008 | 3     | 3 | 2 | 3 | +    |
| 24 | Y   | -    | +  | 2.82405  | -95.1963 | -1391.58 | 0.014 | 1     | 1 | 1 | 2 | -    |
| 25 | Y   | -    | +  | 0.558794 | -21.2854 | 1435.38  | 0.003 | 1     | 1 | 1 | 2 | -    |

| ID | Tam | HER2 | ER | SA       | IMC      | ITC      | V     | Grade | A | M | N | Node |
|----|-----|------|----|----------|----------|----------|-------|-------|---|---|---|------|
| 26 | Y   | -    | +  | 3.39935  | -118.119 | 2200.03  | 0.018 | 3     | 3 | 2 | 3 | -    |
| 27 | Y   | +    | -  | 2.28628  | -94.6485 | 299.74   | 0.009 | 3     | 3 | 2 | 3 | +    |
| 28 | Y   | +    | -  | 2.64124  | -124.631 | -795.789 | 0.011 | 3     | 3 | 2 | 3 | +    |
| 29 | Y   | +    | +  | 1.55899  | -99.5469 | 4087.65  | 0.006 | 2     | 3 | 1 | 2 | -    |
| 30 | Y   | +    | +  | 0.917186 | -51.573  | 2109.26  | 0.004 | 2     | 3 | 1 | 2 | -    |

For each of the 30 tumours, the table shows ER, HER2, lymph node status and whether the tumour has been treated with tamoxifen (Y) or not (N). Additionally, Minkowski functionals used in the analysis (SA, IMC, ITC and V) are provided as absolute values. Tumour grading information (overall grade, A, M and N) and node status are included.
